# Supplementary material for: Impact of Seminal Plasma Antioxidants on Donkey Sperm Cryotolerance
Source: MDPI journal article supplement (doi:10.3390/antiox11020417), 2022-02-18
Supplement: s1 [file s1]

**Table S1.** Mean  $\pm$  SEM and range of the sperm motility parameters after thawing in donkey ejaculates classified as having good (GFE,  $n = 8$ ) or poor freezability (PFE,  $n = 7$ ).

| Parameter               | GFE              |              | PFE              |             |
|-------------------------|------------------|--------------|------------------|-------------|
|                         | Mean $\pm$ SEM   | Range        | Mean $\pm$ SEM   | Range       |
| TM (%)                  | 48.76 $\pm$ 1.58 | 42.35–53.27  | 32.29 $\pm$ 3.17 | 16.09–40.14 |
| PM (%)                  | 30.06 $\pm$ 1.62 | 24.88–36.44  | 17.12 $\pm$ 3.82 | 5.10–30.61  |
| VCL ( $\mu\text{m/s}$ ) | 71.48 $\pm$ 6.39 | 52.71–111.16 | 67.27 $\pm$ 5.68 | 49.54–94.73 |
| VSL ( $\mu\text{m/s}$ ) | 50.21 $\pm$ 6.77 | 35.35–94.52  | 48.38 $\pm$ 5.65 | 30.76–70.83 |
| VAP ( $\mu\text{m/s}$ ) | 55.37 $\pm$ 7.20 | 38.36–102.04 | 52.89 $\pm$ 5.82 | 34.01–75.03 |
| LIN (%)                 | 68.94 $\pm$ 2.89 | 58.54–85.03  | 70.77 $\pm$ 3.27 | 59.90–80.77 |
| STR (%)                 | 90.48 $\pm$ 0.88 | 87.64–93.66  | 91.08 $\pm$ 0.67 | 88.88–94.40 |
| WOB (%)                 | 76.13 $\pm$ 2.84 | 65.20–91.80  | 77.62 $\pm$ 3.24 | 67.40–88.05 |
| ALH ( $\mu\text{m}$ )   | 2.51 $\pm$ 0.12  | 2.08–3.20    | 2.30 $\pm$ 0.12  | 1.88–2.72   |
| BCF (Hz)                | 11.95 $\pm$ 0.56 | 9.80–14.39   | 12.11 $\pm$ 0.53 | 10.28–13.95 |

TM (%): total motility; PM (%): progressive motility; VCL ( $\mu\text{m/s}$ ): curvilinear velocity; VSL ( $\mu\text{m/s}$ ): straight-line velocity; VAP ( $\mu\text{m/s}$ ): average path velocity; LIN (%): linearity coefficient; STR (%): straightness coefficient; WOB (%): wobble coefficient; ALH ( $\mu\text{m}$ ): amplitude of lateral head displacement; BCF (Hz): beat-cross frequency.

**Table S2.** Mean  $\pm$  SEM and range of the sperm function parameters after thawing in donkey ejaculates classified as having good (GFE,  $n = 8$ ) or poor freezability (PFE,  $n = 7$ ).

| Parameter                                    | GFE              |             | PFE              |             |
|----------------------------------------------|------------------|-------------|------------------|-------------|
|                                              | Mean $\pm$ SEM   | Range       | Mean $\pm$ SEM   | Range       |
| SYBR14 <sup>+</sup> /PI <sup>-</sup> (%)     | 48.85 $\pm$ 1.23 | 43.16–55.48 | 30.43 $\pm$ 2.64 | 20.89–37.40 |
| High MMP (%)                                 | 1.81 $\pm$ 0.13  | 1.42–2.36   | 2.12 $\pm$ 0.12  | 1.72–2.44   |
| Intermediate MMP (%)                         | 39.09 $\pm$ 1.95 | 30.40–46.28 | 55.64 $\pm$ 3.49 | 42.90–68.52 |
| DCF <sup>+</sup> /PI <sup>-</sup> (%)        | 0.07 $\pm$ 0.03  | 0.02–0.27   | 0.12 $\pm$ 0.04  | 0.04–0.33   |
| E <sup>+</sup> /YO-PRO-1 <sup>-</sup> (%)    | 0.52 $\pm$ 0.13  | 0.13–1.04   | 0.91 $\pm$ 0.27  | 0.28–1.97   |
| Fluo3 <sup>+</sup> /PI <sup>-</sup> (%)      | 8.08 $\pm$ 0.93  | 5.69–14.36  | 9.92 $\pm$ 1.50  | 4.41–16.11  |
| M540 <sup>+</sup> /YO-PRO-1 <sup>-</sup> (%) | 2.02 $\pm$ 0.28  | 1.12–2.91   | 1.32 $\pm$ 0.20  | 0.39–1.89   |

SYBR14<sup>+</sup>/Propidium iodide (PI)<sup>-</sup> (%): sperm with intact plasma membrane (viable sperm); High MMP (%): sperm with high mitochondrial membrane potential; Intermediate MMP (%): sperm with intermediate mitochondrial membrane potential; Dichlorofluorescein (DCF)<sup>+</sup>/PI<sup>-</sup> (%): viable sperm with high intracellular ROS levels; Ethidium (E)<sup>+</sup>/YO-PRO-1<sup>-</sup> (%): viable sperm with high-O<sub>2</sub><sup>-</sup> levels; Fluo3-acetomethoxyester (Fluo3)<sup>+</sup>/PI<sup>-</sup> (%): viable sperm with high levels of intracellular calcium; Merocyanine 540 (M540)<sup>+</sup>/YO-PRO-1<sup>-</sup> (%): viable sperm with high membrane lipid disorder.

**Table S3.** Mean  $\pm$  SEM and range of the levels of enzymatic and non-enzymatic antioxidants in seminal plasma (SP), as well as levels of seminal oxidative stress index (OSI) of all donkey ejaculates included in the study.

| Group                      | Antioxidant                       | Mean $\pm$ SEM       | Range          |
|----------------------------|-----------------------------------|----------------------|----------------|
| Enzymatic antioxidants     | PON1 (IU/L)                       | 0.25 $\pm$ 0.04      | 0.10–0.70      |
|                            | SOD (IU/mL)                       | 2168.80 $\pm$ 216.72 | 320.00–3784.00 |
|                            | CAT (IU/mL)                       | 0.26 $\pm$ 0.04      | 0.08–0.48      |
|                            | GPX (IU/L)                        | 101.59 $\pm$ 12.97   | 10.20–172.00   |
| Non-enzymatic antioxidants | Total thiol ( $\mu\text{mol/L}$ ) | 81.55 $\pm$ 8.95     | 34.30–157.50   |
|                            | CUPRAC (mmol/L)                   | 1.67 $\pm$ 0.14      | 0.61–2.40      |
|                            | FRAP (mmol/L)                     | 1.71 $\pm$ 0.18      | 0.34–2.85      |
|                            | TEAC (mmol/L)                     | 2.30 $\pm$ 0.15      | 0.98–3.03      |
| TOS ( $\mu\text{mol/L}$ )  |                                   | 7.41 $\pm$ 0.54      | 2.40–9.30      |
| OSI (arbitrary units)      |                                   | 3.60 $\pm$ 0.51      | 0.88–9.38      |

PON1 (IU/L): paraoxonase type 1; SOD (IU/mL): superoxide dismutase; CAT (IU/mL): catalase-like; GPX (IU/L): glutathione peroxidase-like; CUPRAC (mmol/L): cupric reducing antioxidant capacity; FRAP (mmol/L): plasma iron-reducing capacity; TEAC (mmol/L): Trolox equivalent antioxidant capacity; TOS ( $\mu\text{mol/L}$ ): total oxidative status; OSI (arbitrary units): seminal oxidative stress index.
